# Supplementary material
Source: PubMed Central journal article supplement (PMC7658830)
Supplement: 20-00473.pdf [file 20-00473.pdf]

**On-line Table 1: Subgroup comparison of functional dependence versus independence (mRS ≤2 at 3 months), unsuccessful versus successful recanalization, and symptomatic versus asymptomatic intracerebral hemorrhage**

|                                                           | Functional Dependence | Functional Independence | Functional Dependence Value | Functional Independence Value | Unsuccessful Recanalization | Successful Recanalization | P Value       | sICH          | No sICH | P Value |
|-----------------------------------------------------------|-----------------------|-------------------------|-----------------------------|-------------------------------|-----------------------------|---------------------------|---------------|---------------|---------|---------|
| <b>Patient characteristics</b>                            |                       |                         |                             |                               |                             |                           |               |               |         |         |
| Age (mean) (yr)                                           | 65.9 ± 11.5           | 61.4 ± 14.4             | .002                        | 64 ± 11.6                     | 64.9 ± 13.2                 | .64                       | 65 ± 13.1     | 65.5 ± 12.3   | .7      |         |
| Left-hemisphere stroke (No./No.) (%)                      | 28/51 (54.9%)         | 23/33 (69.7%)           | .17                         | 16/37 (43.2%)                 | 40/58 (69%)                 | .01                       | 16/26 (61.5%) | 39/68 (57.4%) | .7      |         |
| Baseline NIHSS (mean)                                     | 18 ± 4.7              | 16.1 ± 5.4              | .9                          | 17.8 ± 4.2                    | 16 ± 6.1                    | .43                       | 18.3 ± 4.7    | 16.2 ± 5.7    | .09     |         |
| Baseline ASPECTS (median) (range)                         | 7 ± 2                 | 9 ± 1.6                 | .12                         | 7 ± 2                         | 8 ± 1.9                     | .02                       | 6.5 ± 2.2     | 8 ± 1.8       | .02     |         |
| Intravenous thrombolysis (No./No.) (%)                    | 24/51 (47.1%)         | 17/33 (51.5%)           | .69                         | 18/37 (48.6%)                 | 27/58 (46.6%)               | .8                        | 13/26 (50%)   | 31/68 (45.6%) | .13     |         |
| Prestroke antiplatelet therapy (No./No.) (%)              | 9/51 (17.6%)          | 8/33 (24.2%)            | .46                         | 9/37 (24.3%)                  | 12/58 (20.7%)               | .68                       | 3/26 (11.5%)  | 17/68 (25%)   | .15     |         |
| <b>Procedural characteristics</b>                         |                       |                         |                             |                               |                             |                           |               |               |         |         |
| Onset to groin time (min) (median)                        | 270 ± 137.3           | 233 ± 186.3             | .78                         | 275 ± 141.2                   | 236 ± 166.5                 | .01                       | 277 ± 180     | 245 ± 148     | .45     |         |
| Onset to recanalization (min) (median)                    | 360 ± 141.7           | 317.5 ± 210             | .07                         | 362.5 ± 152.8                 | 330 ± 177.9                 | .63                       | 353 ± 192.9   | 350 ± 158.7   | .84     |         |
| Procedural time (median) (min)                            | 77.5 ± 62.5           | 84 ± 54                 | .3                          | 75 ± 71.9                     | 81 ± 47.9                   | .68                       | 100.5 ± 58.1  | 75 ± 58.4     | .47     |         |
| No. of MT attempts (median)                               | 3 ± 2                 | 2 ± 1.2                 | .26                         | 3 ± 2                         | 2 ± 1.4                     | .12                       | 3 ± 2.2       | 2 ± 1.5       | .39     |         |
| Intraprocedural heparin (No./No.) (%)                     | 27/51 (52.9%)         | 12/33 (36.4%)           | .14                         | 11/37 (29.7%)                 | 29/58 (50%)                 | .052                      | 14/26 (53.8%) | 25/68 (36.8%) | .13     |         |
| Intraprocedural single-antiplatelet therapy (No./No.) (%) | 22/43 (51.2%)         | 16/27 (59.3%)           | .51                         | 16/30 (53.3%)                 | 30/49 (61.2%)               | .49                       | 11/22 (50%)   | 35/56 (62.5%) | .31     |         |
| Intraprocedural dual-antiplatelet therapy (No./No.) (%)   | 5/26 (19.2%)          | 4/15 (26.7%)            | .59                         | 4/18 (22.2%)                  | 6/25 (24%)                  | .89                       | 3/14 (21.4%)  | 7/28 (25%)    | .8      |         |
| Successful recanalization mTICI ≥2b (No./No.) (%)         | 27/51 (52.9%)         | 25/33 (75.8%)           | .036                        | /                             | /                           | /                         | 17/26 (65.4%) | 40/68 (58.8%) | .56     |         |
| Atheromatous lesion (No./No.) (%)                         | 28/46 (60.9%)         | 23/33 (69.7%)           | .4                          | 25/34 (73.5%)                 | 33/55 (60%)                 | .45                       | 13/23 (56.5%) | 45/65 (69.2%) | .027    |         |
| <b>Postprocedural characteristics</b>                     |                       |                         |                             |                               |                             |                           |               |               |         |         |
| Postprocedural single-antiplatelet therapy (No./No.) (%)  | 17/36 (47.2%)         | 3/12 (25%)              | .18                         | 7/19 (36.8%)                  | 18/35 (51.4%)               | .31                       | 8/19 (42.1%)  | 17/34 (50%)   | .58     |         |
| Postprocedural dual-antiplatelet therapy (No./No.) (%)    | 7/27 (25.9%)          | 19/28 (67.9%)           | .001                        | 12/25 (48%)                   | 18/35 (51.4%)               | .79                       | 4/16 (25%)    | 26/43 (60.5%) | .015    |         |
| sICH (No./No.) (%)                                        | 21/50 (42%)           | 3/33 (9.1%)             | .001                        | 9/37 (24.3%)                  | 17/57 (29.8%)               | .56                       | —             | —             | —       |         |
| Early stent patency (No./No.) (%)                         | 25/31 (80.6%)         | 20/24 (83.3%)           | .8                          | 19/28 (67.9%)                 | 31/36 (86.1%)               | .08                       | 17/18 (94.4%) | 33/46 (71.7%) | .049    |         |

**Note:**— indicates no need; mTICI, modified TICI.

**On-line Table 2: Univariate logistic regression analyses with ORs for functional independence, successful recanalization, stent patency, and symptomatic intracerebral hemorrhage**

|                                             | Functional Independence |         | Successful Recanalization |         | Stent Patency     |         | sICH             |         |
|---------------------------------------------|-------------------------|---------|---------------------------|---------|-------------------|---------|------------------|---------|
|                                             | OR (95% CI)             | P Value | OR (95% CI)               | P Value | OR (95% CI)       | P Value | OR (95% CI)      | P Value |
| Patient characteristics                     |                         |         |                           |         |                   |         |                  |         |
| Age                                         | 0.97 (0.94-1)           | .11     | 1 (0.97-1.03)             | .73     | 0.96 (0.32-1)     | .23     | 0.98 (0.95-1.02) | .5      |
| Left-hemisphere stroke                      | 1.89 (0.75-4.76)        | .18     | 2.91 (1.23-6.86)          | .01     | 2.12 (0.63-7.08)  | .22     | 1.19 (0.4-3)     | .8      |
| Baseline NIHSS                              | 0.92 (0.84-1)           | .12     | 0.94 (0.86-1.02)          | .15     | 0.97 (0.86-1.09)  | .67     | 1.07 (0.97-1.18) | .12     |
| Baseline ASPECTS                            | 1.53 (1.16-2)           | .002    | 1.13 (0.91-1.39)          | .25     | 0.94 (0.7-1.26)   | .68     | 0.72 (0.56-0.92) | .009    |
| Intravenous thrombolysis                    | 1.19 (0.49-2.87)        | .69     | 0.91 (0.4-2.09)           | .84     | 0.58 (0.17-1.95)  | .38     | 1.19 (0.48-2.95) | .7      |
| Prestroke antiplatelet therapy              | 1.49 (0.51-4.36)        | .46     | 0.81 (0.3-2.17)           | .67     | 0.69 (0.15-3.07)  | .63     | 0.39 (0.1-1.46)  | .15     |
| Procedural characteristics                  |                         |         |                           |         |                   |         |                  |         |
| Onset-to-groin time                         | 1 (0.99-1)              | .79     | 1 (0.99-1)                | .75     | 1 (0.99-1)        | .44     | 1 (0.99-1)       | .63     |
| Onset-to-recanalization                     | 1 (0.99-1)              | .81     | 1 (0.99-1)                | .51     | 1 (0.99-1)        | .84     | 1 (0.99-1)       | .41     |
| Procedural time                             | 0.99 (0.99-1)           | .66     | 0.99 (0.99-1)             | .33     | 0.99 (0.99-1)     | .13     | 1 (0.99-1)       | .21     |
| No. of MT attempts                          | 0.71 (0.55-0.99)        | .04     | 0.69 (0.51-0.93)          | .01     | 0.71 (0.5-1)      | .05     | 1.3 (0.98-1.75)  | .06     |
| Intraprocedural heparin                     | 0.5 (0.2-1.24)          | .18     | 2.3 (0.98-5.65)           | .058    | 2.93 (0.81-10.61) | .13     | 2 (0.8-5)        | .16     |
| Intraprocedural single-antiplatelet therapy | 1.38 (0.52-3.67)        | .62     | 1.3 (0.55-3.46)           | .64     | 0.51 (0.13-2)     | .49     | 0.6 (0.22-1.62)  | .32     |
| Intraprocedural dual-antiplatelet therapy   | 1.52 (0.34-6.86)        | .7      | 1.1 (0.26-4.67)           | 1       | 0.57 (0.08-3.9)   | .61     | 0.81 (0.17-3.8)  | 1       |
| Successful recanalization mTICI $\geq$ 2b   | 2.77 (1.05-7.31)        | .04     | /                         | /       | 2.93 (0.85-10.1)  | .12     | 1.32 (0.51-3.38) | .64     |
| Atheromatous lesion (OR) (95% CI)           | 1.47 (0.57-3.82)        | .42     | 0.54 (0.21-1.37)          | .19     | 0.75 (0.2-2.7)    | .69     | 0.57 (0.21-1.5)  | .27     |
| Postprocedural characteristics              |                         |         |                           |         |                   |         |                  |         |
| sICH                                        | 0.13 (0.37-0.51)        | .001    | 1.31 (0.51-3.38)          | .64     | 6.69 (0.8-55.59)  | .89     | /                | -       |
| Postprocedural single-antiplatelet therapy  | 0.37 (0.08-1.6)         | .31     | 1.81 (0.57-5.69)          | .39     | 0.84 (0.16-4.43)  | 1       | 0.72 (0.23-2.25) | .77     |
| Postprocedural dual-antiplatelet therapy    | 6.03 (1.87-19.44)       | .003    | 1.14 (0.41-3.2)           | 1       | 0.73 (0.15-3.46)  | .71     | 0.21 (0.06-0.78) | .02     |
| Dual-layer stents                           | 0.59 (0.1-3.25)         | .69     | 2 (0.38-10.58)            | .47     | 0.05 (0.005-0.5)  | .007    | -                | .1      |

**Note:** --- indicates no need; OR, odds ratio; mTICI, modified TICI.
